# Supplementary material
Source: PubMed Central journal article supplement (PMC4656734)
Supplement: ajcr0005-3111-f7.pdf [file ajcr0005-3111-f7.pdf]

# Phylums

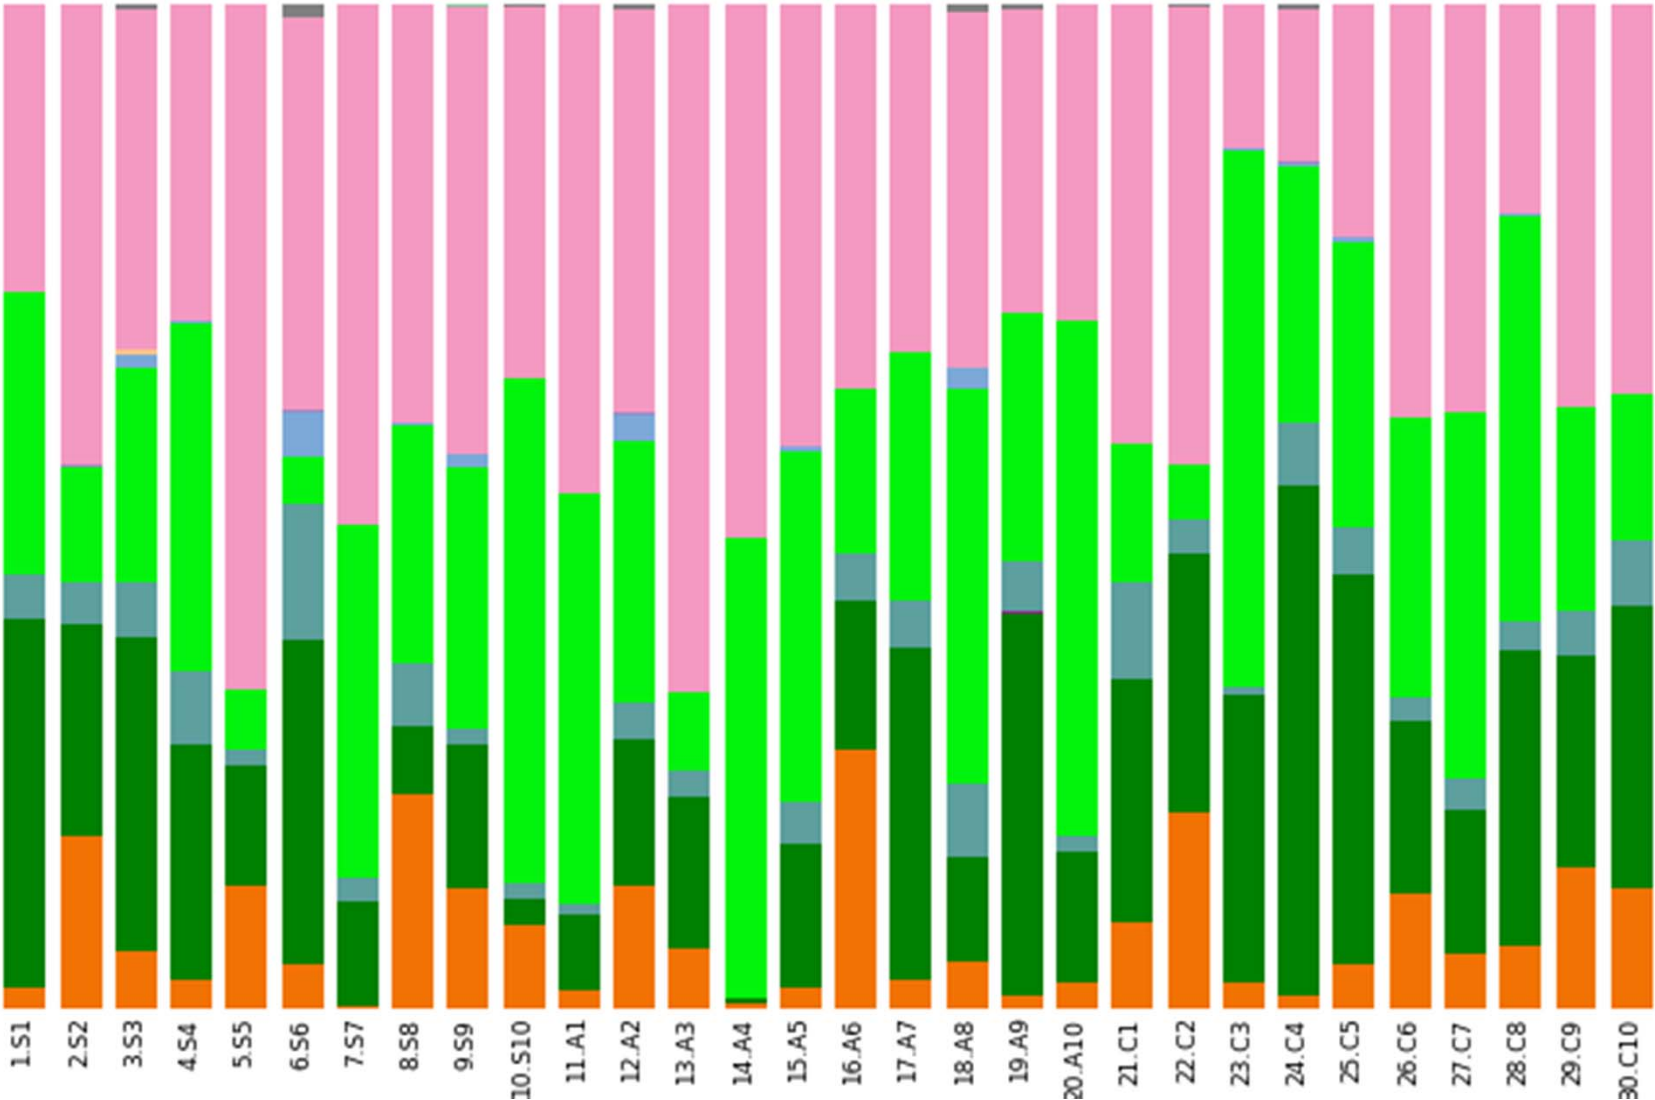

-  Archaea;Euryarchaeota
-  Bacteria;Acidobacteria
-  Bacteria;Actinobacteria
-  Bacteria;Bacteroidetes
-  Bacteria;Chloroflexi
-  Bacteria;Deferribacteres
-  Bacteria;Deinococcus-Thermus
-  Bacteria;Fusobacteria
-  Bacteria;Gemmatimonadetes
-  Bacteria;Proteobacteria
-  Bacteria;Spirochaetes
-  Bacteria;Synergistetes
-  Bacteria;Tenericutes
-  Bacteria;Firmicutes
-  Bacteria;Other
-  Bacteria;SR1
-  Bacteria;TM7

# Classes

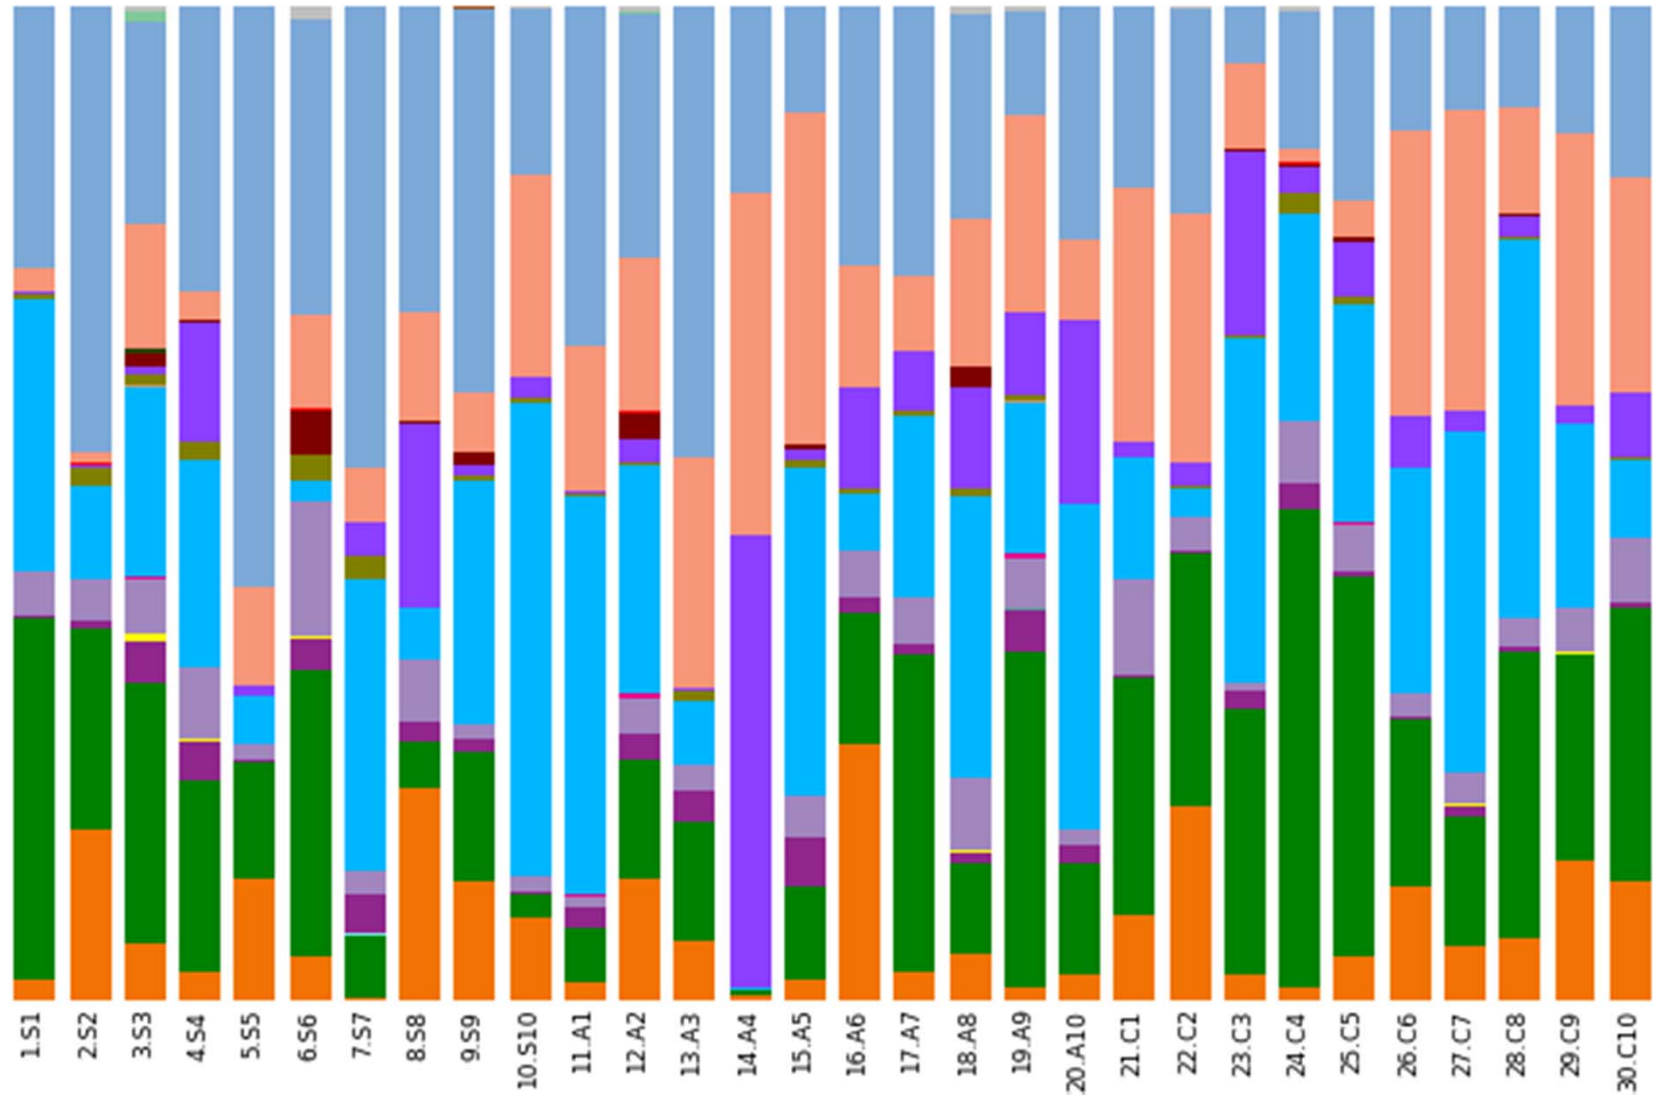

- Archaea;Euryarchaeota;Other
- Bacteria;Acidobacteria;Acidobacteria\_Gp18
- Bacteria;Actinobacteria;Actinobacteria
- Bacteria;Bacteroidetes;Bacteroidia
- Bacteria;Bacteroidetes;Sphingobacteria
- Bacteria;Bacteroidetes;Flavobacteria
- Bacteria;Bacteroidetes;Other
- Bacteria;Chloroflexi;Dehalococcoidetes
- Bacteria;Chloroflexi;Caldilineae
- Bacteria;Chloroflexi;Other
- Bacteria;Deferribacteres;Deferribacteres
- Bacteria;Deinococcus-Thermus;Deinococci
- Bacteria;Fusobacteria;Fusobacteria
- Bacteria;Gemmatimonadetes;Gemmatimonadetes
- Bacteria;Proteobacteria;Alphaproteobacteria
- Bacteria;Proteobacteria;Betaproteobacteria
- Bacteria;Proteobacteria;Deltaproteobacteria
- Bacteria;Proteobacteria;Epsilonproteobacteria
- Bacteria;Proteobacteria;Gammaproteobacteria
- Bacteria;Proteobacteria;Other
- Bacteria;Spirochaetes;Spirochaetes
- Bacteria;Synergistetes;Synergistia
- Bacteria;Tenericutes;Mollicutes
- Bacteria;Firmicutes;Bacilli
- Bacteria;Firmicutes;Clostridia
- Bacteria;Firmicutes;Erysipelotrichia
- Bacteria;Firmicutes;Other
- Bacteria;Other;Other
- Bacteria;SR1;SR1\_class\_incertain\_sedis
- Bacteria;TM7;TM7\_class\_incertain\_sedis

# Orders

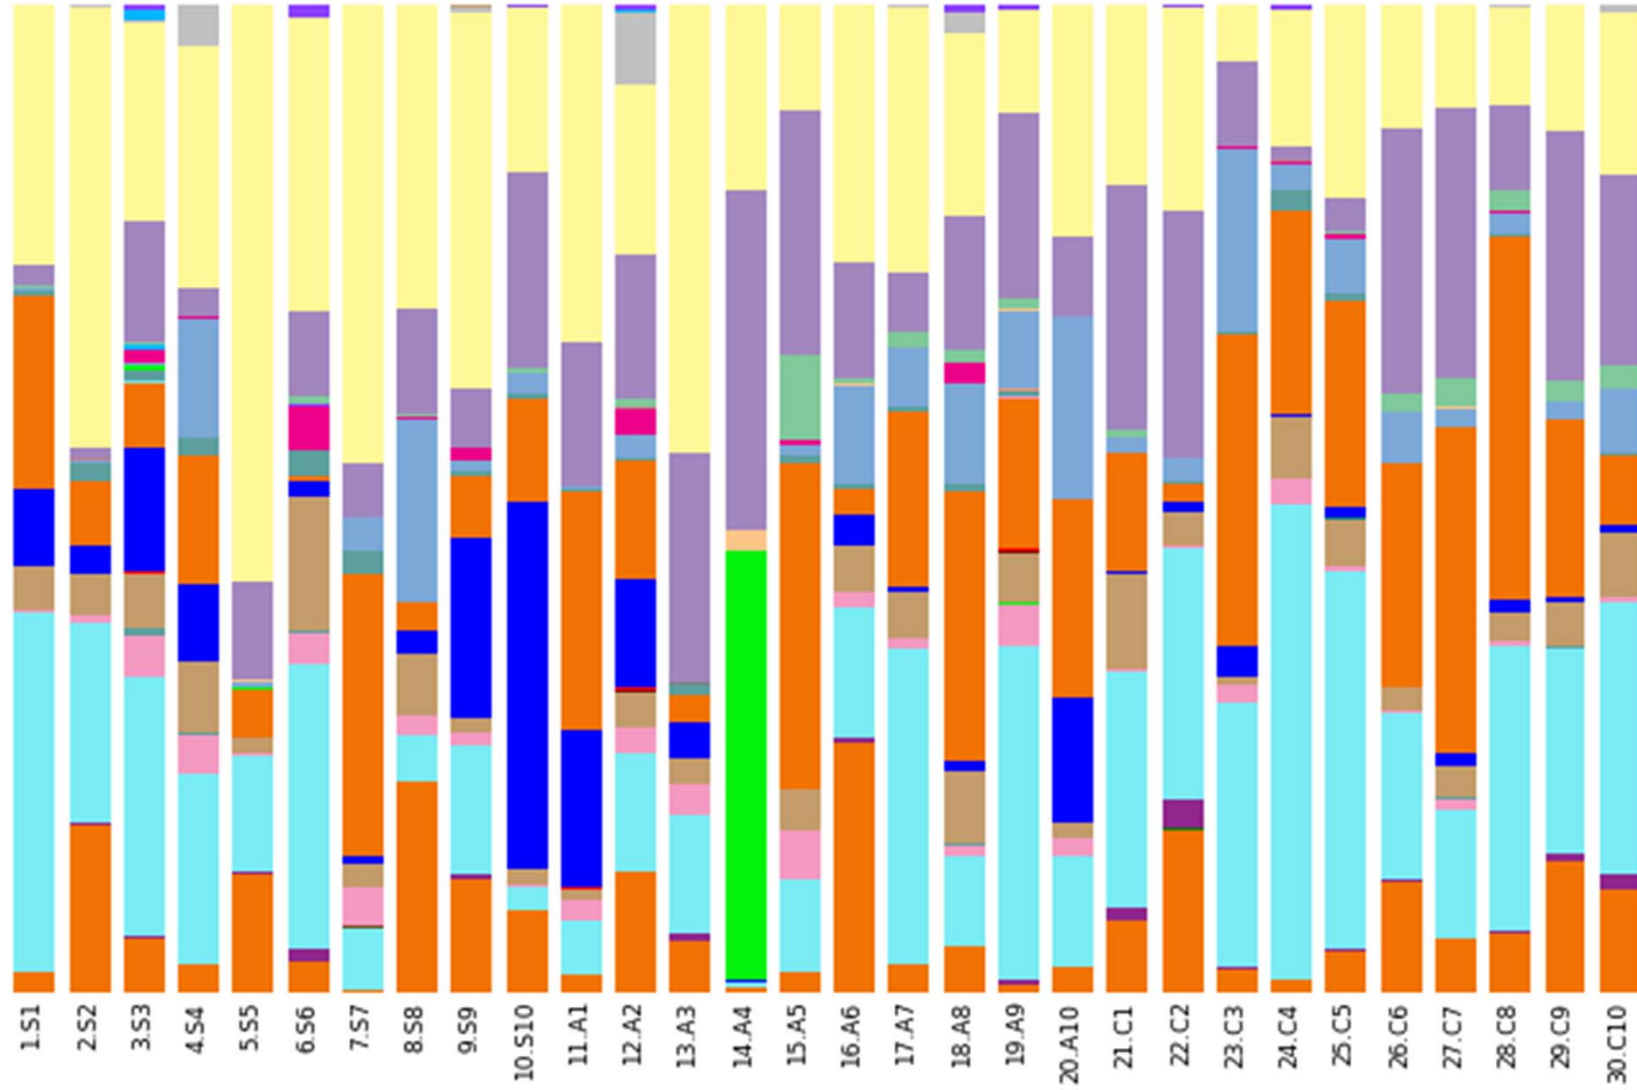

Archaea;Euryarchaeota;Other;Other  
Bacteria;Acidobacteria;Acidobacteria\_Gp18;Acidobacteria\_Gp18\_order\_incertae\_sedis  
Bacteria;Actinobacteria;Actinobacteria;Actinomycetales  
Bacteria;Actinobacteria;Actinobacteria;Bifidobacteriales  
Bacteria;Actinobacteria;Actinobacteria;Coriobacteriales  
Bacteria;Actinobacteria;Actinobacteria;Solirubrobacterales  
Bacteria;Bacteroidetes;Bacteroidia;Bacteroidales  
Bacteria;Bacteroidetes;Sphingobacteria;Sphingobacteriales  
Bacteria;Bacteroidetes;Flavobacteria;Flavobacteriales  
Bacteria;Bacteroidetes;Other;Other  
Bacteria;Chloroflexi;Dehalococcoidetes;Dehalococcoidetes\_order\_incertae\_sedis  
Bacteria;Chloroflexi;Caldilineae;Caldilineales  
Bacteria;Chloroflexi;Other;Other  
Bacteria;Deferribacteres;Deferribacteres;Deferribacterales  
Bacteria;Deinococcus-Thermus;Deinococci;Deinococcales  
Bacteria;Fusobacteria;Fusobacteria;Fusobacteriales  
Bacteria;Gemmatimonadetes;Gemmatimonadetes;Gemmatimonadales  
Bacteria;Proteobacteria;Alphaproteobacteria;Caulobacteriales  
Bacteria;Proteobacteria;Alphaproteobacteria;Other  
Bacteria;Proteobacteria;Alphaproteobacteria;Rhizobiales  
Bacteria;Proteobacteria;Alphaproteobacteria;Rhodobacteriales  
Bacteria;Proteobacteria;Alphaproteobacteria;Rhodospirillales  
Bacteria;Proteobacteria;Alphaproteobacteria;Sphingomonadales  
Bacteria;Proteobacteria;Betaproteobacteria;Burkholderiales  
Bacteria;Proteobacteria;Betaproteobacteria;Neisseriales  
Bacteria;Proteobacteria;Betaproteobacteria;Other  
Bacteria;Proteobacteria;Betaproteobacteria;Rhodocyclales  
Bacteria;Proteobacteria;Deltaproteobacteria;Desulfobacteriales  
Bacteria;Proteobacteria;Deltaproteobacteria;Desulfovibrionales  
Bacteria;Proteobacteria;Deltaproteobacteria;Other  
Bacteria;Proteobacteria;Epsilonproteobacteria;Campylobacteriales  
Bacteria;Proteobacteria;Gammaproteobacteria;Enterobacteriales  
Bacteria;Proteobacteria;Gammaproteobacteria;Vibrionales  
Bacteria;Proteobacteria;Gammaproteobacteria;Aeromonadales  
Bacteria;Proteobacteria;Gammaproteobacteria;Cardiobacteriales  
Bacteria;Proteobacteria;Gammaproteobacteria;Legionellales  
Bacteria;Proteobacteria;Gammaproteobacteria;Pasteurellales  
Bacteria;Proteobacteria;Gammaproteobacteria;Pseudomonadales  
Bacteria;Proteobacteria;Gammaproteobacteria;Xanthomonadales  
Bacteria;Proteobacteria;Other;Other  
Bacteria;Spirochaetes;Spirochaetes;Spirochaetales  
Bacteria;Synergistetes;Synergistia;Synergistales  
Bacteria;Tenericutes;Mollicutes;Acholeplasmatales  
Bacteria;Tenericutes;Mollicutes;Anaeroplasmatales  
Bacteria;Tenericutes;Mollicutes;Mycoplasmatales  
Bacteria;Firmicutes;Bacilli;Bacillales  
Bacteria;Firmicutes;Bacilli;Lactobacillales  
Bacteria;Firmicutes;Clostridia;Clostridiales  
Bacteria;Firmicutes;Clostridia;Other  
Bacteria;Firmicutes;Erysipelotrichia;Erysipelotrichales  
Bacteria;Firmicutes;Other;Other  
Bacteria;Other;Other;Other  
Bacteria;SR1;SR1\_class\_incertae\_sedis;SR1\_order\_incertae\_sedis  
Bacteria;TM7;TM7\_class\_incertae\_sedis;TM7\_order\_incertae\_sedis

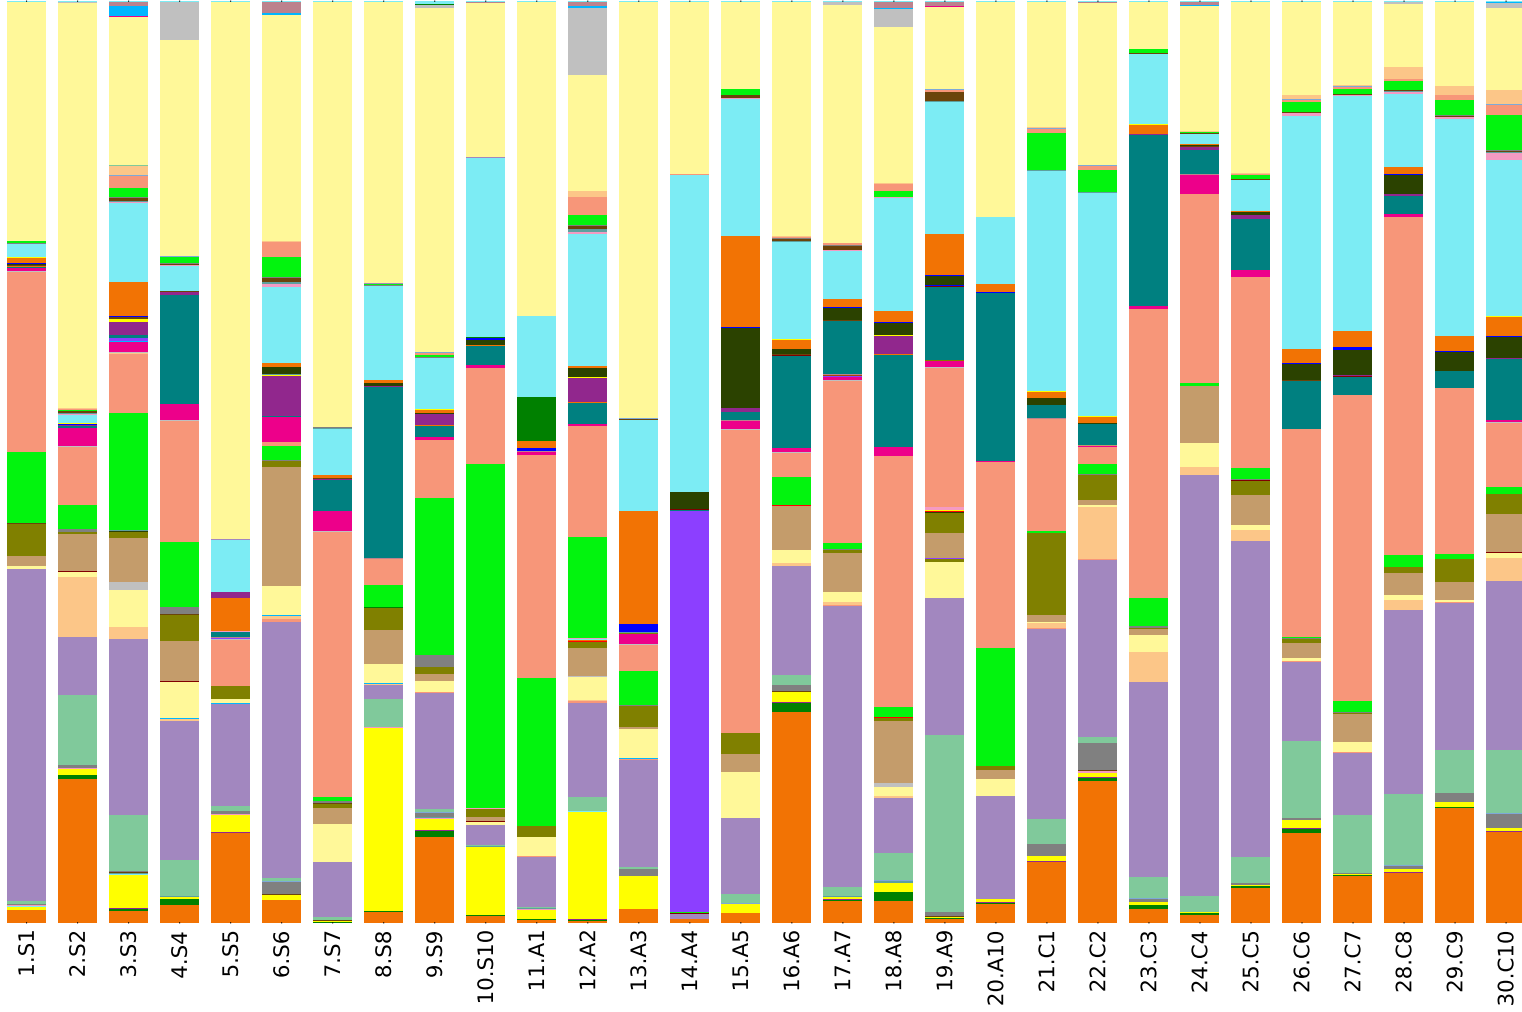

Archaea;Euryarchaeota;Other;Other;Other  
Bacteria;Acidobacteria;Acidobacteria\_Gp18;Acidobacteria\_Gp18\_order\_incertainae\_sedis;Acidobacteria\_Gp18\_family\_incertainae\_sedis  
Bacteria;Actinobacteria;Actinobacteria;Actinomycetales;Actinomycetaceae  
Bacteria;Actinobacteria;Actinobacteria;Actinomycetales;Corynebacteriaceae  
Bacteria;Actinobacteria;Actinobacteria;Actinomycetales;Microbacteriaceae  
Bacteria;Actinobacteria;Actinobacteria;Actinomycetales;Micrococcaceae  
Bacteria;Actinobacteria;Actinobacteria;Actinomycetales;Mycobacteriaceae  
Bacteria;Actinobacteria;Actinobacteria;Actinomycetales;Other  
Bacteria;Actinobacteria;Actinobacteria;Actinomycetales;Propionibacteriaceae  
Bacteria;Actinobacteria;Actinobacteria;Bifidobacteriales;Bifidobacteriaceae  
Bacteria;Actinobacteria;Actinobacteria;Coriobacteriales;Coriobacteriaceae  
Bacteria;Actinobacteria;Actinobacteria;Solirubrobacteriales;Conexibacteraceae  
Bacteria;Bacteroidetes;Bacteroidia;Bacteroidales;Bacteroidales\_incertainae\_sedis  
Bacteria;Bacteroidetes;Bacteroidia;Bacteroidales;Porphyromonadaceae  
Bacteria;Bacteroidetes;Bacteroidia;Bacteroidales;Prevotellaceae  
Bacteria;Bacteroidetes;Bacteroidia;Bacteroidales;Bacteroidaceae  
Bacteria;Bacteroidetes;Bacteroidia;Bacteroidales;Other  
Bacteria;Bacteroidetes;Sphingobacteria;Sphingobacteriales;Other  
Bacteria;Bacteroidetes;Sphingobacteria;Sphingobacteriales;Sphingobacteriaceae  
Bacteria;Bacteroidetes;Flavobacteria;Flavobacteriales;Flavobacteriaceae  
Bacteria;Bacteroidetes;Other;Other;Other  
Bacteria;Chloroflexi;Dehalococcoidetes;Dehalococcoidetes\_order\_incertainae\_sedis;Dehalococcoidetes\_family\_incertainae\_sedis  
Bacteria;Chloroflexi;Caldilineae;Caldilineales;Caldilineaceae  
Bacteria;Chloroflexi;Other;Other;Other  
Bacteria;Deferribacteres;Deferribacteres;Deferribacteriales;Deferribacteraceae  
Bacteria;Deferribacteres;Deferribacteres;Deferribacteriales;Deferribacteriales\_incertainae\_sedis  
Bacteria;Deinococcus-Thermus;Deinococci;Deinococcales;Deinococcaceae  
Bacteria;Fusobacteria;Fusobacteria;Fusobacteriales;Fusobacteriaceae  
Bacteria;Fusobacteria;Fusobacteria;Fusobacteriales;Leptotrichiaceae  
Bacteria;Gemmatimonadetes;Gemmatimonadetes;Gemmatimonadales;Gemmatimonadaceae  
Bacteria;Proteobacteria;Alphaproteobacteria;Caulobacteriales;Caulobacteraceae  
Bacteria;Proteobacteria;Alphaproteobacteria;Other;Other  
Bacteria;Proteobacteria;Alphaproteobacteria;Rhizobiales;Bradyrhizobiaceae  
Bacteria;Proteobacteria;Alphaproteobacteria;Rhizobiales;Brucellaceae  
Bacteria;Proteobacteria;Alphaproteobacteria;Rhizobiales;Hyphomicrobiaceae  
Bacteria;Proteobacteria;Alphaproteobacteria;Rhizobiales;Methylobacteriaceae  
Bacteria;Proteobacteria;Alphaproteobacteria;Rhizobiales;Phyllobacteriaceae  
Bacteria;Proteobacteria;Alphaproteobacteria;Rhizobiales;Rhizobiaceae  
Bacteria;Proteobacteria;Alphaproteobacteria;Rhodobacterales;Rhodobacteraceae  
Bacteria;Proteobacteria;Alphaproteobacteria;Rhodospirillales;Acetobacteraceae  
Bacteria;Proteobacteria;Alphaproteobacteria;Rhodospirillales;Rhodospirillaceae  
Bacteria;Proteobacteria;Alphaproteobacteria;Sphingomonadales;Sphingomonadaceae  
Bacteria;Proteobacteria;Betaproteobacteria;Burkholderiales;Alcaligenaceae  
Bacteria;Proteobacteria;Betaproteobacteria;Burkholderiales;Burkholderiales\_incertainae\_sedis  
Bacteria;Proteobacteria;Betaproteobacteria;Burkholderiales;Comamonadaceae  
Bacteria;Proteobacteria;Betaproteobacteria;Burkholderiales;Other  
Bacteria;Proteobacteria;Betaproteobacteria;Neisseriales;Neisseriaceae  
Bacteria;Proteobacteria;Betaproteobacteria;Other;Other  
Bacteria;Proteobacteria;Betaproteobacteria;Rhodocyclales;Rhodocyclaceae  
Bacteria;Proteobacteria;Deltaproteobacteria;Desulfobacteriales;Desulfobulbaceae  
Bacteria;Proteobacteria;Deltaproteobacteria;Desulfovibrionales;Desulfomicrobiaceae  
Bacteria;Proteobacteria;Deltaproteobacteria;Desulfovibrionales;Desulfovibrionaceae  
Bacteria;Proteobacteria;Deltaproteobacteria;Other;Other  
Bacteria;Proteobacteria;Epsilonproteobacteria;Campylobacteriales;Campylobacteraceae  
Bacteria;Proteobacteria;Epsilonproteobacteria;Campylobacteriales;Other  
Bacteria;Proteobacteria;Gammaproteobacteria;Enterobacteriales;Enterobacteriaceae  
Bacteria;Proteobacteria;Gammaproteobacteria;Vibrionales;Vibrionaceae  
Bacteria;Proteobacteria;Gammaproteobacteria;Aeromonadales;Aeromonadaceae  
Bacteria;Proteobacteria;Gammaproteobacteria;Cardiobacteriales;Cardiobacteriaceae  
Bacteria;Proteobacteria;Gammaproteobacteria;Legionellales;Legionellaceae  
Bacteria;Proteobacteria;Gammaproteobacteria;Pasteurellales;Pasteurellaceae  
Bacteria;Proteobacteria;Gammaproteobacteria;Pseudomonadales;Moraxellaceae  
Bacteria;Proteobacteria;Gammaproteobacteria;Pseudomonadales;Pseudomonadaceae  
Bacteria;Proteobacteria;Gammaproteobacteria;Xanthomonadales;Sinobacteraceae  
Bacteria;Proteobacteria;Gammaproteobacteria;Xanthomonadales;Xanthomonadaceae  
Bacteria;Proteobacteria;Other;Other;Other  
Bacteria;Spirochaetes;Spirochaetes;Spirochaetales;Spirochaetaceae  
Bacteria;Synergistetes;Synergistia;Synergistales;Synergistaceae  
Bacteria;Tenericutes;Mollicutes;Acholeplasmatales;Acholeplasmataceae  
Bacteria;Tenericutes;Mollicutes;Anaeroplasmatales;Anaeroplasmataceae  
Bacteria;Tenericutes;Mollicutes;Mycoplasmatales;Mycoplasmataceae  
Bacteria;Firmicutes;Bacilli;Bacillales;Bacillales\_Incertainae\_Sedis\_XI  
Bacteria;Firmicutes;Bacilli;Bacillales;Paenibacillaceae\_1  
Bacteria;Firmicutes;Bacilli;Bacillales;Staphylococcaceae  
Bacteria;Firmicutes;Bacilli;Lactobacillales;Aerococcaceae  
Bacteria;Firmicutes;Bacilli;Lactobacillales;Carnobacteriaceae  
Bacteria;Firmicutes;Bacilli;Lactobacillales;Lactobacillaceae  
Bacteria;Firmicutes;Bacilli;Lactobacillales;Leuconostocaceae  
Bacteria;Firmicutes;Bacilli;Lactobacillales;Other  
Bacteria;Firmicutes;Bacilli;Lactobacillales;Streptococcaceae  
Bacteria;Firmicutes;Clostridia;Clostridiales;Clostridiales\_Incertainae\_Sedis\_XI  
Bacteria;Firmicutes;Clostridia;Clostridiales;Clostridiales\_Incertainae\_Sedis\_XIII  
Bacteria;Firmicutes;Clostridia;Clostridiales;Eubacteriaceae  
Bacteria;Firmicutes;Clostridia;Clostridiales;Incertainae\_Sedis\_XI  
Bacteria;Firmicutes;Clostridia;Clostridiales;Lachnospiraceae  
Bacteria;Firmicutes;Clostridia;Clostridiales;Other  
Bacteria;Firmicutes;Clostridia;Clostridiales;Peptococcaceae\_1  
Bacteria;Firmicutes;Clostridia;Clostridiales;Peptostreptococcaceae  
Bacteria;Firmicutes;Clostridia;Clostridiales;Ruminococcaceae  
Bacteria;Firmicutes;Clostridia;Clostridiales;Syntrophomonadaceae  
Bacteria;Firmicutes;Clostridia;Clostridiales;Veillonellaceae  
Bacteria;Firmicutes;Clostridia;Other;Other  
Bacteria;Firmicutes;Erysipelotrichia;Erysipelotrichales;Erysipelotrichaceae  
Bacteria;Firmicutes;Other;Other;Other  
Bacteria;Other;Other;Other;Other  
Bacteria;SR1;SR1\_class\_incertainae\_sedis;SR1\_order\_incertainae\_sedis;SR1\_family\_incertainae\_sedis  
Bacteria;TM7;TM7\_class\_incertainae\_sedis;TM7\_order\_incertainae\_sedis;TM7\_family\_incertainae\_sedis





Archaea;Euryarchaeota;Other;Other;Other;Other  
Bacteria;Acidobacteria;Acidobacteria\_Gp18;Acidobacteria\_Gp18\_order\_incertae\_sedis;Acidobacteria\_Gp18\_family\_incertae\_sedis;Gp18  
Bacteria;Actinobacteria;Actinobacteria;Actinomycetales;Actinomycetaceae;Actinomyces  
Bacteria;Actinobacteria;Actinobacteria;Actinomycetales;Actinomycetaceae;Mobiluncus  
Bacteria;Actinobacteria;Actinobacteria;Actinomycetales;Corynebacteriaceae;Corynebacterium  
Bacteria;Actinobacteria;Actinobacteria;Actinomycetales;Microbacteriaceae;Leifsonia  
Bacteria;Actinobacteria;Actinobacteria;Actinomycetales;Micrococccaceae;Rothia  
Bacteria;Actinobacteria;Actinobacteria;Actinomycetales;Mycobacteriaceae;Mycobacterium  
Bacteria;Actinobacteria;Actinobacteria;Actinomycetales;Other;Other  
Bacteria;Actinobacteria;Actinobacteria;Actinomycetales;Propionibacteriaceae;Other  
Bacteria;Actinobacteria;Actinobacteria;Actinomycetales;Propionibacteriaceae;Propionibacterium  
Bacteria;Actinobacteria;Actinobacteria;Bifidobacteriales;Bifidobacteriaceae;Alloscardovia  
Bacteria;Actinobacteria;Actinobacteria;Coriobacteriales;Coriobacteriaceae;Atopobium  
Bacteria;Actinobacteria;Actinobacteria;Coriobacteriales;Coriobacteriaceae;Cryptobacterium  
Bacteria;Actinobacteria;Actinobacteria;Coriobacteriales;Coriobacteriaceae;Olsenella  
Bacteria;Actinobacteria;Actinobacteria;Coriobacteriales;Coriobacteriaceae;Slackia  
Bacteria;Actinobacteria;Actinobacteria;Solirubrobacteriales;Conexibacteriaceae;Conexibacter  
Bacteria;Bacteroidetes;Bacteroidia;Bacteroidales;Bacteroidales\_incertae\_sedis;Phocaeicola  
Bacteria;Bacteroidetes;Bacteroidia;Bacteroidales;Porphyromonadaceae;Odoribacter  
Bacteria;Bacteroidetes;Bacteroidia;Bacteroidales;Porphyromonadaceae;Other  
Bacteria;Bacteroidetes;Bacteroidia;Bacteroidales;Porphyromonadaceae;Porphyromonas  
Bacteria;Bacteroidetes;Bacteroidia;Bacteroidales;Porphyromonadaceae;Tannerella  
Bacteria;Bacteroidetes;Bacteroidia;Bacteroidales;Prevotellaceae;Hallella  
Bacteria;Bacteroidetes;Bacteroidia;Bacteroidales;Prevotellaceae;Other  
Bacteria;Bacteroidetes;Bacteroidia;Bacteroidales;Prevotellaceae;Prevotella  
Bacteria;Bacteroidetes;Bacteroidia;Bacteroidales;Bacteroidaceae;Bacteroides  
Bacteria;Bacteroidetes;Bacteroidia;Bacteroidales;Other;Other  
Bacteria;Bacteroidetes;Sphingobacteria;Sphingobacteriales;Other;Other  
Bacteria;Bacteroidetes;Sphingobacteria;Sphingobacteriales;Sphingobacteriaceae;Other  
Bacteria;Bacteroidetes;Flavobacteria;Flavobacteriales;Flavobacteriaceae;Capnocytophaga  
Bacteria;Bacteroidetes;Flavobacteria;Flavobacteriales;Flavobacteriaceae;Chryseobacterium  
Bacteria;Bacteroidetes;Flavobacteria;Flavobacteriales;Flavobacteriaceae;Other  
Bacteria;Bacteroidetes;Other;Other;Other;Other  
Bacteria;Chloroflexi;Dehalococcoidetes;Dehalococcoidetes\_order\_incertae\_sedis;Dehalococcoidetes\_family\_incertae\_sedis;Dehalogenimonas  
Bacteria;Chloroflexi;Caldilineae;Caldilineales;Caldilineaceae;Caldilinea  
Bacteria;Chloroflexi;Other;Other;Other;Other  
Bacteria;Deferribacteres;Deferribacteres;Deferribacterales;Deferribacteraceae;Mucispirillum  
Bacteria;Deferribacteres;Deferribacteres;Deferribacterales;Deferribacterales\_incertae\_sedis;Caldithrix  
Bacteria;Deinococcus-Thermus;Deinococci;Deinococcales;Deinococcaceae;Deinococcus  
Bacteria;Fusobacteria;Fusobacteria;Fusobacteriales;Fusobacteriaceae;Fusobacterium  
Bacteria;Fusobacteria;Fusobacteria;Fusobacteriales;Leptotrichiaceae;Leptotrichia  
Bacteria;Fusobacteria;Fusobacteria;Fusobacteriales;Leptotrichiaceae;Other  
Bacteria;Gemmatimonadetes;Gemmatimonadetes;Gemmatimonadales;Gemmatimonadaceae;Gemmatimonas  
Bacteria;Proteobacteria;Alphaproteobacteria;Caulobacteriales;Caulobacteraceae;Brevundimonas  
Bacteria;Proteobacteria;Alphaproteobacteria;Caulobacteriales;Caulobacteraceae;Other  
Bacteria;Proteobacteria;Alphaproteobacteria;Other;Other;Other  
Bacteria;Proteobacteria;Alphaproteobacteria;Rhizobiales;Bradyrhizobiaceae;Afipia  
Bacteria;Proteobacteria;Alphaproteobacteria;Rhizobiales;Brucellaceae;Ochrobactrum  
Bacteria;Proteobacteria;Alphaproteobacteria;Rhizobiales;Hyphomicrobiaceae;Hyphomicrobium  
Bacteria;Proteobacteria;Alphaproteobacteria;Rhizobiales;Methylobacteriaceae;Methylobacterium  
Bacteria;Proteobacteria;Alphaproteobacteria;Rhizobiales;Phyllobacteriaceae;Other  
Bacteria;Proteobacteria;Alphaproteobacteria;Rhizobiales;Rhizobiaceae;Rhizobium  
Bacteria;Proteobacteria;Alphaproteobacteria;Rhodobacteriales;Rhodobacteraceae;Other  
Bacteria;Proteobacteria;Alphaproteobacteria;Rhodobacteriales;Rhodobacteraceae;Paracoccus  
Bacteria;Proteobacteria;Alphaproteobacteria;Rhodospirillales;Acetobacteraceae;Acidisoma  
Bacteria;Proteobacteria;Alphaproteobacteria;Rhodospirillales;Rhodospirillaceae;Other  
Bacteria;Proteobacteria;Alphaproteobacteria;Sphingomonadales;Sphingomonadaceae;Sandaracinobacter  
Bacteria;Proteobacteria;Alphaproteobacteria;Sphingomonadales;Sphingomonadaceae;Sphingomonas  
Bacteria;Proteobacteria;Betaproteobacteria;Burkholderiales;Alcaligenaceae;Achromobacter  
Bacteria;Proteobacteria;Betaproteobacteria;Burkholderiales;Burkholderiales\_incertae\_sedis;Aquabacterium  
Bacteria;Proteobacteria;Betaproteobacteria;Burkholderiales;Burkholderiales\_incertae\_sedis;Tepidimonas  
Bacteria;Proteobacteria;Betaproteobacteria;Burkholderiales;Comamonadaceae;Brachymonas  
Bacteria;Proteobacteria;Betaproteobacteria;Burkholderiales;Comamonadaceae;Other  
Bacteria;Proteobacteria;Betaproteobacteria;Burkholderiales;Comamonadaceae;Schlegelella  
Bacteria;Proteobacteria;Betaproteobacteria;Burkholderiales;Other;Other  
Bacteria;Proteobacteria;Betaproteobacteria;Neisseriales;Neisseriaceae;Kingella  
Bacteria;Proteobacteria;Betaproteobacteria;Neisseriales;Neisseriaceae;Neisseria  
Bacteria;Proteobacteria;Betaproteobacteria;Neisseriales;Neisseriaceae;Other  
Bacteria;Proteobacteria;Betaproteobacteria;Other;Other;Other  
Bacteria;Proteobacteria;Betaproteobacteria;Rhodocyclales;Rhodocyclaceae;Propionivibrio  
Bacteria;Proteobacteria;Deltaproteobacteria;Desulfobacteriales;Desulfobulbaceae;Desulfobulbus  
Bacteria;Proteobacteria;Deltaproteobacteria;Desulfovibrionales;Desulfomicrobiaceae;Desulfomicrobium  
Bacteria;Proteobacteria;Deltaproteobacteria;Desulfovibrionales;Desulfovibrionaceae;Desulfovibrio  
Bacteria;Proteobacteria;Deltaproteobacteria;Desulfovibrionales;Desulfovibrionaceae;Other  
Bacteria;Proteobacteria;Deltaproteobacteria;Other;Other;Other  
Bacteria;Proteobacteria;Epsilonproteobacteria;Campylobacteriales;Campylobacteraceae;Campylobacter  
Bacteria;Proteobacteria;Epsilonproteobacteria;Campylobacteriales;Other;Other  
Bacteria;Proteobacteria;Gammaproteobacteria;Enterobacteriales;Enterobacteriaceae;Escherichia\_Shigella  
Bacteria;Proteobacteria;Gammaproteobacteria;Enterobacteriales;Enterobacteriaceae;Other  
Bacteria;Proteobacteria;Gammaproteobacteria;Vibrionales;Vibrionaceae;Vibrio  
Bacteria;Proteobacteria;Gammaproteobacteria;Aeromonadales;Aeromonadaceae;Aeromonas  
Bacteria;Proteobacteria;Gammaproteobacteria;Cardiobacteriales;Cardiobacteriaceae;Cardiobacterium  
Bacteria;Proteobacteria;Gammaproteobacteria;Cardiobacteriales;Cardiobacteriaceae;Other  
Bacteria;Proteobacteria;Gammaproteobacteria;Legionellales;Legionellaceae;Legionella  
Bacteria;Proteobacteria;Gammaproteobacteria;Pasteurellales;Pasteurellaceae;Aggregatibacter  
Bacteria;Proteobacteria;Gammaproteobacteria;Pasteurellales;Pasteurellaceae;Haemophilus  
Bacteria;Proteobacteria;Gammaproteobacteria;Pasteurellales;Pasteurellaceae;Other  
Bacteria;Proteobacteria;Gammaproteobacteria;Pseudomonadales;Moraxellaceae;Acinetobacter  
Bacteria;Proteobacteria;Gammaproteobacteria;Pseudomonadales;Moraxellaceae;Enhydrobacter  
Bacteria;Proteobacteria;Gammaproteobacteria;Pseudomonadales;Moraxellaceae;Moraxella  
Bacteria;Proteobacteria;Gammaproteobacteria;Pseudomonadales;Moraxellaceae;Other  
Bacteria;Proteobacteria;Gammaproteobacteria;Pseudomonadales;Pseudomonadaceae;Pseudomonas  
Bacteria;Proteobacteria;Gammaproteobacteria;Xanthomonadales;Sinobacteraceae;Nevskia  
Bacteria;Proteobacteria;Gammaproteobacteria;Xanthomonadales;Sinobacteraceae;Steroidobacter  
Bacteria;Proteobacteria;Gammaproteobacteria;Xanthomonadales;Xanthomonadaceae;Dyella  
Bacteria;Proteobacteria;Gammaproteobacteria;Xanthomonadales;Xanthomonadaceae;Rudaea  
Bacteria;Proteobacteria;Gammaproteobacteria;Xanthomonadales;Xanthomonadaceae;Stenotrophomonas  
Bacteria;Proteobacteria;Other;Other;Other;Other  
Bacteria;Spirochaetes;Spirochaetes;Spirochaetales;Spirochaetaceae;Spirochaeta  
Bacteria;Spirochaetes;Spirochaetes;Spirochaetales;Spirochaetaceae;Treponema  
Bacteria;Synergistetes;Synergistia;Synergistales;Synergistaceae;Pyramidobacter  
Bacteria;Synergistetes;Synergistia;Synergistales;Synergistaceae;Synergistes  
Bacteria;Tenericutes;Mollicutes;Acholeplasmatales;Acholeplasmataceae;Acholeplasma  
Bacteria;Tenericutes;Mollicutes;Anaeroplasmatales;Anaeroplasmataceae;Asteroleplasma  
Bacteria;Tenericutes;Mollicutes;Mycoplasmatales;Mycoplasmataceae;Mycoplasma  
Bacteria;Firmicutes;Bacilli;Bacillales;Bacillales\_Incertae\_Sedis\_XI;Gemella  
Bacteria;Firmicutes;Bacilli;Bacillales;Paenibacillaceae\_1;Brevibacillus  
Bacteria;Firmicutes;Bacilli;Bacillales;Staphylococcaceae;Macrococcus  
Bacteria;Firmicutes;Bacilli;Bacillales;Staphylococcaceae;Staphylococcus  
Bacteria;Firmicutes;Bacilli;Lactobacillales;Aerococcaceae;Abiotrophia  
Bacteria;Firmicutes;Bacilli;Lactobacillales;Carnobacteriaceae;Granulicatella  
Bacteria;Firmicutes;Bacilli;Lactobacillales;Lactobacillaceae;Lactobacillus  
Bacteria;Firmicutes;Bacilli;Lactobacillales;Leuconostocaceae;Weissella  
Bacteria;Firmicutes;Bacilli;Lactobacillales;Other;Other  
Bacteria;Firmicutes;Bacilli;Lactobacillales;Streptococcaceae;Streptococcus  
Bacteria;Firmicutes;Clostridia;Clostridiales;Clostridiales\_Incertae\_Sedis\_XI;Parvimonas  
Bacteria;Firmicutes;Clostridia;Clostridiales;Clostridiales\_Incertae\_Sedis\_XIII;Anaerovorax  
Bacteria;Firmicutes;Clostridia;Clostridiales;Clostridiales\_Incertae\_Sedis\_XIII;Mogibacterium  
Bacteria;Firmicutes;Clostridia;Clostridiales;Clostridiales\_Incertae\_Sedis\_XIII;Other  
Bacteria;Firmicutes;Clostridia;Clostridiales;Eubacteriaceae;Eubacterium  
Bacteria;Firmicutes;Clostridia;Clostridiales;Eubacteriaceae;Pseudoramibacter  
Bacteria;Firmicutes;Clostridia;Clostridiales;Incertae\_Sedis\_XI;Other  
Bacteria;Firmicutes;Clostridia;Clostridiales;Lachnospiraceae;Butyrivibrio  
Bacteria;Firmicutes;Clostridia;Clostridiales;Lachnospiraceae;Catonella  
Bacteria;Firmicutes;Clostridia;Clostridiales;Lachnospiraceae;Johnsonella  
Bacteria;Firmicutes;Clostridia;Clostridiales;Lachnospiraceae;Oribacterium  
Bacteria;Firmicutes;Clostridia;Clostridiales;Lachnospiraceae;Other  
Bacteria;Firmicutes;Clostridia;Clostridiales;Lachnospiraceae;Shuttleworthia  
Bacteria;Firmicutes;Clostridia;Clostridiales;Other;Other  
Bacteria;Firmicutes;Clostridia;Clostridiales;Peptococcaceae\_1;Peptococcus  
Bacteria;Firmicutes;Clostridia;Clostridiales;Peptostreptococcaceae;Filifactor  
Bacteria;Firmicutes;Clostridia;Clostridiales;Peptostreptococcaceae;Peptostreptococcaceae\_incertae\_sedis  
Bacteria;Firmicutes;Clostridia;Clostridiales;Peptostreptococcaceae;Peptostreptococcus  
Bacteria;Firmicutes;Clostridia;Clostridiales;Ruminococcaceae;Other  
Bacteria;Firmicutes;Clostridia;Clostridiales;Syntrophomonadaceae;Other  
Bacteria;Firmicutes;Clostridia;Clostridiales;Veillonellaceae;Anaeroglobus  
Bacteria;Firmicutes;Clostridia;Clostridiales;Veillonellaceae;Centipeda  
Bacteria;Firmicutes;Clostridia;Clostridiales;Veillonellaceae;Dialister  
Bacteria;Firmicutes;Clostridia;Clostridiales;Veillonellaceae;Megasphaera  
Bacteria;Firmicutes;Clostridia;Clostridiales;Veillonellaceae;Other  
Bacteria;Firmicutes;Clostridia;Clostridiales;Veillonellaceae;Schwartzia  
Bacteria;Firmicutes;Clostridia;Clostridiales;Veillonellaceae;Selenomonas  
Bacteria;Firmicutes;Clostridia;Clostridiales;Veillonellaceae;Succinoclasticum  
Bacteria;Firmicutes;Clostridia;Clostridiales;Veillonellaceae;Veillonella  
Bacteria;Firmicutes;Clostridia;Other;Other;Other  
Bacteria;Firmicutes;Erysipelotrichia;Erysipelotrichales;Erysipelotrichaceae;Solobacterium  
Bacteria;Firmicutes;Other;Other;Other;Other  
Bacteria;Other;Other;Other;Other;Other;Other  
Bacteria;SR1;SR1\_class\_incertae\_sedis;SR1\_order\_incertae\_sedis;SR1\_family\_incertae\_sedis;SR1\_genera\_incertae\_sedis  
Bacteria;TM7;TM7\_class\_incertae\_sedis;TM7\_order\_incertae\_sedis;TM7\_family\_incertae\_sedis;TM7\_genera\_incertae\_sedis
